# Supplementary material for: The Human Monocyte—A Circulating Sensor of Infection and a Potent and Rapid Inducer of Inflammation
Source: MDPI journal article supplement (doi:10.3390/ijms23073890), 2022-03-31
Supplement: s1 [file s1]

## Supplementary Tables

**Table S1 Lysozyme, Actin and MHC**

The five different donors are listed as 1-5. Donors 1-4 were treated with 1 ug/ml of *E. coli* LPS and donor 5 with 200 ng/ml of IFN- $\gamma$ . Donor 1 is a male age 51, donor 2 a male age 43, donor 3 a female age 47, donor 4 a male age 28 and donor 5 a female age 61.

| <u>Gene</u> | <u>0</u> | <u>4h</u> | <u>24h</u> | <u>48h</u> | <u>4h+LPS</u><br>(IFN- $\gamma$ ) | <u>24h+LPS</u><br>(IFN- $\gamma$ ) | <u>48h+LPS</u><br>(IFN- $\gamma$ ) |
|-------------|----------|-----------|------------|------------|-----------------------------------|------------------------------------|------------------------------------|
| Lysozyme 1. | 27394    | -         | -          | -          | 5200                              | 480                                | 2658                               |
| 2.          | 29951    | -         | -          | -          | 1990                              | 11457                              | 6628                               |
| 3.          | 25335    | 7417      | 16476      | 21289      | 3130                              | 245                                | 2914                               |
| 4.          | 16400    | 4836      | 5469       | 6410       | 3941                              | 419                                | 1740                               |
| 5.IFN       | 11290    | 4227      | 7457       | 12834      | 4248                              | 16429                              | 22705                              |
| Actin-b 1.  | 19693    | -         | -          | -          | 6700                              | 8574                               | 7094                               |
| 2.          | 21775    | -         | -          | -          | 13102                             | 17563                              | 13373                              |
| 3.          | 14866    | 6943      | 11192      | 11799      | 5027                              | 9130                               | 13934                              |
| 4.          | 23328    | 29919     | 19278      | 31241      | 8769                              | 11644                              | 22776                              |
| 5.IFN       | 32168    | 19263     | 82706      | 20846      | 26870                             | 36242                              | 31642                              |
| HLA-DRA 1.  | 5490     | -         | -          | -          | 5705                              | 733                                | 654                                |
| 2.          | 7224     | -         | -          | -          | 4227                              | 3819                               | 921                                |
| 3.          | 934      | 1337      | 1579       | 2739       | 1145                              | 52                                 | 108                                |
| 4.          | 6558     | 6151      | 5958       | 8558       | 8578                              | 858                                | 722                                |
| 5.IFN       | 3645     | 2592      | 2964       | 7227       | 2262                              | 11944                              | 11375                              |
| HLA-DRB1 1. | 3023     | -         | -          | -          | 1748                              | 421                                | 528                                |
| 2.          | 26       | -         | -          | -          | 1                                 | 8                                  | 3                                  |
| 3.          | 1820     | 1897      | 3980       | 6568       | 1227                              | 108                                | 327                                |
| 4.          | 21       | 184       | 15         | 16         | 7                                 | 0.7                                | 10                                 |
| 5.IFN       | 2188     | 2126      | 3042       | 5800       | 2523                              | 7713                               | 6935                               |
| HLA-DPA1 1. | 2375     | -         | -          | -          | 649                               | 147                                | 305                                |
| 2.          | 4872     | -         | -          | -          | 377                               | 2156                               | 846                                |
| 3.          | 1656     | 1332      | 2660       | 5358       | 548                               | 28                                 | 55                                 |
| 4.          | 5268     | 3616      | 3802       | 5241       | 2065                              | 263                                | 302                                |
| 5.IFN       | 4099     | 2807      | 4661       | 7697       | 6769                              | 16952                              | 16471                              |
| HLA-DPB1 1. | 1029     | -         | -          | -          | 360                               | 68                                 | 83                                 |
| 2.          | 2162     | -         | -          | -          | 89                                | 738                                | 245                                |
| 3.          | 551      | 665       | 1122       | 2553       | 186                               | 6                                  | 19                                 |
| 4.          | 1478     | 1423      | 1359       | 2090       | 799                               | 76                                 | 104                                |
| 5.IFN       | 1506     | 978       | 2002       | 4441       | 2451                              | 5613                               | 5399                               |
| HLA-DPB2 1. | 0        | -         | -          | -          | 0.3                               | 0                                  | 4                                  |
| 2.          | 0.4      | -         | -          | -          | 0                                 | 0.3                                | 0                                  |
| 3.          | 0        | 0         | 0          | 0          | 0                                 | 0.7                                | 0.2                                |
| 4.          | 0        | 0         | 0          | 0          | 0                                 | 0.1                                | 0                                  |
| 5.IFN       | 0.1      | 0         | 0          | 0          | 0.2                               | 0                                  | 0                                  |
| HLA-DQA1 1. | 103      | -         | -          | -          | 186                               | 154                                | 93                                 |
| 2.          | 6        | -         | -          | -          | 0.5                               | 3                                  | 2                                  |
| 3.          | 86       | 85        | 309        | 735        | 94                                | 6                                  | 16                                 |
| 4.          | 9        | 39        | 3          | 8          | 3                                 | 0.7                                | 6                                  |
| 5.IFN       | 378      | 285       | 975        | 1596       | 1163                              | 3237                               | 2473                               |

|                      |      |      |      |      |      |      |      |
|----------------------|------|------|------|------|------|------|------|
| HLA-DQA2 1.          | 0    | -    | -    | -    | 0    | 0.2  | 0.3  |
| 2.                   | 0    | -    | -    | -    | 0.3  | 0.5  | 0.2  |
| 3.                   | 0    | 0    | 0    | 0    | 0    | 0.2  | 0    |
| 4.                   | 0.8  | 0.2  | 0.8  | 0    | 0.4  | 0.1  | 0.5  |
| 5.IFN                | 0    | 0    | 0    | 0.3  | 0    | 0.3  | 0.1  |
| HLA-DQB2 1.          | 0    | -    | -    | -    | 0    | 0    | 0    |
| 2.                   | 0    | -    | -    | -    | 0    | 0    | 0.2  |
| 3.                   | 0    | 0    | 0    | 0    | 0    | 0    | 0    |
| 4.                   | 0.3  | 0    | 0    | 0    | 0    | 0    | 0    |
| 5.IFN                | 0    | 0    | 0.4  | 0.2  | 0.8  | 0.8  | 0.3  |
| HLA-DMA 1.           | 254  | -    | -    | -    | 70   | 23   | 29   |
| 2.                   | 308  | -    | -    | -    | 54   | 244  | 122  |
| 3.                   | 290  | 177  | 596  | 778  | 71   | 4.9  | 14   |
| 4.                   | 412  | 318  | 463  | 611  | 146  | 26   | 42   |
| 5.IFN                | 415  | 203  | 761  | 792  | 374  | 1153 | 918  |
| HLA-DMB 1.           | 0.3  | -    | -    | -    | 0.1  | 0    | 0.2  |
| 2.                   | 35   | -    | -    | -    | 5    | 18   | 8    |
| 3.                   | 0.3  | 0    | 0    | 0.3  | 0    | 0    | 0.2  |
| 4.                   | 0.1  | 0.5  | 0.2  | 0    | 0    | 0    | 0    |
| 5.IFN                | 0    | 0    | 0.4  | 0    | 0    | 0.1  | 0    |
| HLA-DOA 1.           | 12   | -    | -    | -    | 2    | 3    | 4    |
| 2                    | 13   | -    | -    | -    | 2    | 3    | 3    |
| 3.                   | 2    | 0    | 4    | 7    | 0.6  | 0    | 0.2  |
| 4.                   | 7    | 3    | 3    | 6    | 2    | 3    | 0.7  |
| 5.IFN                | 12   | 5    | 10   | 36   | 14   | 34   | 59   |
| HLA-DOB 1.           | 0.1  | -    | -    | -    | 0.4  | 0.2  | 1    |
| 2.                   | 0.5  | -    | -    | -    | 5    | 5    | 11   |
| 3.                   | 0.2  | 0    | 0.2  | 0.5  | 0.6  | 0    | 0.6  |
| 4.                   | 2    | 0    | 0.5  | 0.1  | 0.5  | 7    | 4    |
| 5.IFN                | 0.3  | 0.2  | 0    | 0.6  | 0.2  | 0.9  | 0.2  |
| CD74 1.              | 1088 | -    | -    | -    | 378  | 99   | 116  |
| 2.                   | 673  | -    | -    | -    | 90   | 758  | 366  |
| (Inv. chain) 3.      | 62   | 47   | 75   | 163  | 20   | 0.9  | 11   |
| 4.                   | 419  | 353  | 448  | 733  | 420  | 36   | 52   |
| 5.IFN                | 840  | 295  | 459  | 2030 | 171  | 2359 | 4603 |
| CHTA 1.              | 73   | -    | -    | -    | 7    | 24   | 39   |
| 2.                   | 94   | -    | -    | -    | 39   | 150  | 84   |
| (Transcr. factor) 3. | 238  | 290  | 1508 | 884  | 29   | 13   | 30   |
| 4.                   | 599  | 210  | 275  | 482  | 106  | 51   | 60   |
| 5.IFN                | 245  | 183  | 1859 | 828  | 2766 | 1366 | 1172 |
| HLA-A 1.             | 1548 | -    | -    | -    | 1594 | 1466 | 1165 |
| 2.                   | 1186 | -    | -    | -    | 481  | 328  | 276  |
| 3.                   | 420  | 680  | 477  | 704  | 560  | 350  | 298  |
| 4.                   | 383  | 497  | 395  | 147  | 576  | 211  | 338  |
| 5.IFN                | 1755 | 1598 | 5805 | 894  | 3813 | 4053 | 4797 |
| HLA-B 1.             | 6    | -    | -    | -    | 7    | 5    | 4    |
| 2.                   | 8    | -    | -    | -    | 3    | 2    | 2    |
| 3.                   | 1780 | 1715 | 893  | 1164 | 1599 | 925  | 717  |
| 4.                   | 39   | 196  | 17   | 8    | 31   | 21   | 48   |
| 5.IFN                | 1329 | 3005 | 2083 | 1240 | 2452 | 4958 | 4207 |

|                                              |       |       |      |      |      |      |       |       |
|----------------------------------------------|-------|-------|------|------|------|------|-------|-------|
| <b>HLA-C</b>                                 | 1.    | 2979  | -    | -    | -    | 2347 | 1425  | 1044  |
|                                              | 2.    | 1265  | -    | -    | -    | 907  | 701   | 779   |
|                                              | 3.    | 403   | 367  | 143  | 144  | 303  | 191   | 125   |
|                                              | 4.    | 5     | 14   | 5    | 0.4  | 7    | 1     | 1     |
|                                              | 5.IFN | 1     | 3    | 5    | 0.3  | 2    | 6     | 4     |
| <b>HLA-E</b>                                 | 1.    | 2984  | -    | -    | -    | 2408 | 1789  | 1348  |
|                                              | 2.    | 2412  | -    | -    | -    | 2881 | 560   | 1593  |
|                                              | 3.    | 3177  | 2304 | 960  | 1058 | 2801 | 1349  | 1024  |
|                                              | 4.    | 3965  | 5859 | 1380 | 1191 | 2993 | 3923  | 2982  |
|                                              | 5.IFN | 4021  | 3903 | 2122 | 1347 | 8706 | 3846  | 4141  |
| <b>HLA-F</b>                                 | 1.    | 14    | -    | -    | -    | 10   | 13    | 12    |
|                                              | 2.    | 13    | -    | -    | -    | 2    | 2     | 0.7   |
|                                              | 3.    | 2     | 5    | 4    | 0.8  | 2    | 1     | 3     |
|                                              | 4.    | 2     | 2    | 1    | 0.5  | 2    | 0.3   | 0.2   |
|                                              | 5.IFN | 0.1   | 0.8  | 0.4  | 0.6  | 0.3  | 0.1   | 0.5   |
| <b>HLA-G</b>                                 | 1.    | 0.1   | -    | -    | -    | 0.3  | 0.2   | 3     |
|                                              | 2.    | 0.2   | -    | -    | -    | 0    | 0.1   | 0.2   |
|                                              | 3.    | 0     | 0.2  | 0    | 0.2  | 1    | 0     | 0.2   |
|                                              | 4.    | 1     | 3    | 0.3  | 0.2  | 1    | 0.4   | 0.2   |
|                                              | 5.IFN | 0.5   | 0.3  | 0    | 0.3  | 1    | 0.2   | 0.5   |
| <b>B2M</b><br>(Beta-2<br>-micro<br>globulin) | 1.    | 5521  | -    | -    | -    | 4537 | 4451  | 4260  |
|                                              | 2.    | 10399 | -    | -    | -    | 8944 | 6058  | 7060  |
|                                              | 3.    | 1885  | 3598 | 2013 | 3871 | 2174 | 2389  | 3815  |
|                                              | 4.    | 11986 | 8268 | 8304 | 6001 | 9654 | 7219  | 5200  |
|                                              | 5.IFN | 4642  | 4581 | 3562 | 4528 | 3861 | 17607 | 14598 |
| <b>TAP1</b><br>(Peptide.<br>Transp.)         | 1.    | 38    | -    | -    | -    | 281  | 157   | 85    |
|                                              | 2.    | 64    | -    | -    | -    | 187  | 120   | 140   |
|                                              | 3.    | 33    | 75   | 19   | 20   | 132  | 45    | 19    |
|                                              | 4.    | 108   | 538  | 99   | 85   | 430  | 409   | 406   |
|                                              | 5.IFN | 75    | 188  | 149  | 46   | 3066 | 1761  | 1427  |

## **Table S2 TLR and MYD88**

The five different donors are listed as 1-5. Donors 1-4 were treated with 1 ug/ml of *E. coli* LPS and donor 5 with 200 ng/ml of IFN- $\gamma$ . Donor 1 is a male age 51, donor 2 a male age 43, donor 3 a female age 47, donor 4 a male age 28 and donor 5 a female age 61.

| <u>Gene</u> |       | <u>0</u> | <u>4h</u> | <u>24h</u> | <u>48h</u> | <u>4h+LPS</u><br>(IFN- $\gamma$ ) | <u>24h+LPS</u><br>(IFN- $\gamma$ ) | <u>48h+LPS</u><br>(IFN- $\gamma$ ) |
|-------------|-------|----------|-----------|------------|------------|-----------------------------------|------------------------------------|------------------------------------|
| TLR4        | 1.    | 24       | -         | -          | -          | 563                               | 102                                | 138                                |
|             | 2.    | 44       | -         | -          | -          | 332                               | 423                                | 78                                 |
|             | 3.    | 25       | 246       | 157        | 193        | 272                               | 82                                 | 74                                 |
|             | 4.    | 19       | 139       | 233        | 220        | 617                               | 45                                 | 24                                 |
|             | 5.IFN | 18       | 197       | 65         | 202        | 105                               | 157                                | 166                                |
| TLR2        | 1.    | 40       | -         | -          | -          | 306                               | 623                                | 421                                |
|             | 2.    | 47       | -         | -          | -          | 539                               | 195                                | 266                                |
|             | 3.    | 12       | 86        | 49         | 29         | 59                                | 221                                | 302                                |
|             | 4.    | 34       | 165       | 211        | 141        | 211                               | 607                                | 608                                |
|             | 5.IFN | 36       | 299       | 190        | 112        | 93                                | 184                                | 168                                |
| TLR8        | 1.    | 46       | -         | -          | -          | 38                                | 209                                | 262                                |
|             | 2.    | 137      | -         | -          | -          | 195                               | 150                                | 170                                |
|             | 3.    | 26       | 68        | 65         | 47         | 10                                | 145                                | 439                                |
|             | 4.    | 155      | 93        | 92         | 133        | 73                                | 195                                | 135                                |
|             | 5.IFN | 142      | 40        | 96         | 117        | 36                                | 377                                | 316                                |
| TLR1        | 1.    | 6        | -         | -          | -          | 3                                 | 37                                 | 36                                 |
|             | 2.    | 27       | -         | -          | -          | 78                                | 73                                 | 69                                 |
|             | 3.    | 11       | 46        | 24         | 9          | 2                                 | 30                                 | 84                                 |
|             | 4.    | 10       | 22        | 42         | 13         | 6                                 | 10                                 | 16                                 |
|             | 5.IFN | 3        | 22        | 8          | 15         | 4                                 | 17                                 | 19                                 |
| TLR5        | 1.    | 18       | -         | -          | -          | 26                                | 14                                 | 10                                 |
|             | 2.    | 26       | -         | -          | -          | 8                                 | 3                                  | 3                                  |
|             | 3.    | 7        | 18        | 15         | 13         | 7                                 | 9                                  | 10                                 |
|             | 4.    | 7        | 4         | 9          | 2          | 13                                | 0.5                                | 0.5                                |
|             | 5.IFN | 2        | 2         | 2          | 9          | 0                                 | 3                                  | 0.7                                |

Almost no expression of TLR3, TLR6, TLR7, TLR9 and TLR10

|       |       |     |     |     |     |     |     |     |
|-------|-------|-----|-----|-----|-----|-----|-----|-----|
| MYD88 | 1.    | 90  | -   | -   | -   | 178 | 81  | 105 |
|       | 2.    | 154 | -   | -   | -   | 82  | 113 | 107 |
|       | 3.    | 94  | 138 | 78  | 82  | 142 | 80  | 126 |
|       | 4.    | 190 | 233 | 161 | 199 | 152 | 99  | 114 |
|       | 5.IFN | 468 | 241 | 163 | 199 | 446 | 592 | 516 |

Signaling component for TLRs

## **Table S3 Complement and Coagulation**

The five different donors are listed as 1-5. Donors 1-4 were treated with 1 ug/ml of *E. coli* LPS and donor 5 with 200 ng/ml of IFN- $\gamma$ . Donor 1 is a male age 51, donor 2 a male age 43, donor 3 a female age 47, donor 4 a male age 28 and donor 5 a female age 61.

| <u>Gene</u>                         |       | <u>0</u> | <u>4h</u> | <u>24h</u> | <u>48h</u> | <u>4h+LPS</u><br>(IFN- $\gamma$ ) | <u>24h+LPS</u><br>(IFN- $\gamma$ ) | <u>48h+LPS</u><br>(IFN- $\gamma$ ) |
|-------------------------------------|-------|----------|-----------|------------|------------|-----------------------------------|------------------------------------|------------------------------------|
| <b>FCN1</b><br>(Ficolin)            | 1.    | 3198     | -         | -          | -          | 729                               | 15                                 | 105                                |
|                                     | 2.    | 2681     | -         | -          | -          | 547                               | 549                                | 18                                 |
|                                     | 3.    | 1025     | 531       | 679        | 505        | 205                               | 3.4                                | 17                                 |
|                                     | 4.    | 2183     | 1458      | 728        | 614        | 828                               | 25                                 | 65                                 |
|                                     | 5.IFN | 3568     | 1284      | 2411       | 1216       | 1349                              | 879                                | 753                                |
| <b>CFP</b><br>(Properdin)           | 1.    | 991      | -         | -          | -          | 391                               | 307                                | 166                                |
|                                     | 2.    | 1017     | -         | -          | -          | 211                               | 105                                | 140                                |
|                                     | 3.    | 542      | 578       | 203        | 97         | 333                               | 283                                | 146                                |
|                                     | 4.    | 784      | 363       | 78         | 13         | 339                               | 215                                | 134                                |
|                                     | 5.IFN | 1503     | 1203      | 383        | 116        | 936                               | 259                                | 83                                 |
| <b>CFB</b>                          | 1.    | 0.2      | -         | -          | -          | 429                               | 83                                 | 21                                 |
|                                     | 2.    | 0.1      | -         | -          | -          | 123                               | 163                                | 15                                 |
|                                     | 3.    | 2        | 0.3       | 1          | 2          | 222                               | 17                                 | 6.0                                |
|                                     | 4.    | 0        | 0         | 0          | 0.5        | 285                               | 47                                 | 24                                 |
|                                     | 5.IFN | 0.1      | 0.4       | 0.2        | 0.6        | 6                                 | 64                                 | 116                                |
| Complement factor B                 |       |          |           |            |            |                                   |                                    |                                    |
| <b>C3</b>                           | 1.    | 2        | -         | -          | -          | 118                               | 383                                | 555                                |
|                                     | 2.    | 1        | -         | -          | -          | 53                                | 39                                 | 89                                 |
|                                     | 3.    | 2        | 31        | 72         | 46         | 100                               | 84                                 | 135                                |
|                                     | 4.    | 0.1      | 0.7       | 30         | 13         | 29                                | 24                                 | 21                                 |
|                                     | 5.IFN | 0.2      | 9         | 7          | 36         | 1                                 | 5                                  | 17                                 |
| Complement factor 3                 |       |          |           |            |            |                                   |                                    |                                    |
| <b>CFD</b>                          | 1.LPS | 249      | -         | -          | -          | 82                                | 3                                  | 8                                  |
|                                     | 2.    | 196      | -         | -          | -          | 2.7                               | 4                                  | 7                                  |
|                                     | 3.    | 170      | 91        | 74         | 142        | 47                                | 2                                  | 14                                 |
|                                     | 4.    | 206      | 366       | 47         | 119        | 123                               | 8                                  | 10                                 |
|                                     | 5.IFN | 437      | 173       | 200        | 270        | 325                               | 81                                 | 139                                |
| Complement factor D                 |       |          |           |            |            |                                   |                                    |                                    |
| <b>F3</b>                           | 1.    | 0.1      | -         | -          | -          | 110                               | 4.4                                | 1                                  |
|                                     | 2.    | 0        | -         | -          | -          | 506                               | 616                                | 9                                  |
|                                     | 3.    | 0        | 2         | 0          | 2          | 717                               | 13                                 | 2                                  |
|                                     | 4.    | 0        | 0.2       | 0.7        | 5          | 131                               | 49                                 | 7                                  |
|                                     | 5.IFN | 0        | 0.6       | 0.9        | 0.6        | 5                                 | 0.4                                | 0.4                                |
| Coagulation factor 3, Tissue factor |       |          |           |            |            |                                   |                                    |                                    |
| <b>C1QA</b>                         | 1.    | 7        | -         | -          | -          | 0.1                               | 0.6                                | 3                                  |
|                                     | 2.    | 6        | -         | -          | -          | 2                                 | 7                                  | 0.8                                |
|                                     | 3.    | 13       | 7         | 33         | 287        | 2                                 | 1                                  | 3                                  |
|                                     | 4.    | 24       | 5         | 13         | 73         | 4                                 | 1                                  | 1                                  |
|                                     | 5.IFN | 22       | 9         | 8          | 408        | 10                                | 105                                | 567                                |
| Complement factor C1Q- A            |       |          |           |            |            |                                   |                                    |                                    |

## Table S4 Other mixed molecules

The five different donors are listed as 1-5. Donors 1-4 were treated with 1 ug/ml of *E. coli* LPS and donor 5 with 200 ng/ml of IFN- $\gamma$ . Donor 1 is a male age 51, donor 2 a male age 43, donor 3 a female age 47, donor 4 a male age 28 and donor 5 a female age 61. The increase at 4 hrs is marked in black and at 24 hrs in red.

| Gene   |                                            | <u>0</u> | <u>4h</u> | <u>24h</u> | <u>48h</u> | <u>4h+LPS</u><br>(IFN- $\gamma$ ) | <u>24h+LPS</u><br>(IFN- $\gamma$ ) | <u>48h+LPS</u><br>(IFN- $\gamma$ ) |           |
|--------|--------------------------------------------|----------|-----------|------------|------------|-----------------------------------|------------------------------------|------------------------------------|-----------|
| SOD2   | 1.                                         | 1113     | -         | -          | -          | 39601                             | 28919                              | 19446.                             | 36x       |
|        | 2.                                         | 897      | -         | -          | -          | 16333                             | 3515                               | 8325                               |           |
|        | 3.                                         | 525      | 862       | 194        | 215        | 12200                             | 13274                              | 9039                               |           |
|        | 4.                                         | 1469     | 4354      | 777        | 645        | 39054                             | 27788                              | 19487                              |           |
|        | 5.IFN                                      | 566      | 2288      | 742        | 472        | 3329                              | 2558                               | 2077                               |           |
|        | Superoxide dismutase 2                     |          |           |            |            |                                   |                                    |                                    |           |
| ITGB2  | 1.                                         | 1975     | -         | -          | -          | 443                               | 152                                | 786                                |           |
|        | 2.                                         | 1423     | -         | -          | -          | 829                               | 2453                               | 1764                               |           |
|        | 3.                                         | 685      | 340       | 748        | 802        | 124                               | 192                                | 1201                               |           |
|        | 4.                                         | 1504     | 897       | 1076       | 1543       | 456                               | 148                                | 1037                               |           |
|        | 5.IFN                                      | 2479     | 862       | 3309       | 1655       | 1455                              | 1871                               | 2445                               |           |
|        | Integrin beta 2                            |          |           |            |            |                                   |                                    |                                    |           |
| ITGB3  | 1.                                         | 3        | -         | -          | -          | 2                                 | 702                                | 287                                | 1x (234x) |
|        | 2.                                         | 4        | -         | -          | -          | 154                               | 72                                 | 264                                |           |
|        | 3.                                         | 0.7      | 4         | 0.2        | 0          | 2                                 | 100                                | 10                                 |           |
|        | 4.                                         | 1        | 5         | 0.7        | 0.1        | 2                                 | 319                                | 430                                |           |
|        | 5.IFN                                      | 2        | 1         | 0          | 0.3        | 1                                 | 0                                  | 0                                  |           |
|        | Integrin beta 3                            |          |           |            |            |                                   |                                    |                                    |           |
| ITGB8  | 1.                                         | 0        | -         | -          | -          | 206                               | 621                                | 432                                |           |
|        | 2.                                         | 0        | -         | -          | -          | 352                               | 40                                 | 141                                |           |
|        | 3.                                         | 0        | 0.7       | 0.4        | 0.6        | 202                               | 317                                | 91                                 |           |
|        | 4.                                         | 0        | 0.5       | 0.7        | 0          | 107                               | 402                                | 164                                |           |
|        | 5.IFN                                      | 0        | 0.6       | 0.4        | 0.5        | 0                                 | 0.1                                | 0                                  |           |
|        | Integrin beta 8                            |          |           |            |            |                                   |                                    |                                    |           |
| CRIM1  | 1.                                         | 0.8      | -         | -          | -          | 441                               | 513                                | 336                                | 551x      |
|        | 2.                                         | 1        | -         | -          | -          | 815                               | 981                                | 1111                               |           |
|        | 3.                                         | 0.9      | 7         | 12         | 10         | 269                               | 67                                 | 22                                 |           |
|        | 4.                                         | 3        | 7         | 103        | 31         | 268                               | 668                                | 753                                |           |
|        | 5.IFN                                      | 2        | 25        | 29         | 17         | 18                                | 10                                 | 4                                  |           |
|        | Cystein rich Transmembrane BMP regulator 1 |          |           |            |            |                                   |                                    |                                    |           |
| NFKBIA | 1.                                         | 1347     | -         | -          | -          | 4063                              | 2666                               | 1338                               |           |
|        | 2.                                         | 591      | -         | -          | -          | 3705                              | 3480                               | 1439                               |           |
|        | 3.                                         | 2370     | 897       | 308        | 268        | 6131                              | 2681                               | 1402                               |           |
|        | 4.                                         | 900      | 899       | 289        | 160        | 2720                              | 2489                               | 1642                               |           |
|        | 5.IFN                                      | 2415     | 1238      | 605        | 391        | 1835                              | 357                                | 114                                |           |
|        | NFkB component                             |          |           |            |            |                                   |                                    |                                    |           |
| PLA2G7 | 1.                                         | 15       | -         | -          | -          | 284                               | 425                                | 602                                |           |
|        | 2.                                         | 3        | -         | -          | -          | 800                               | 545                                | 633                                |           |
|        | 3.                                         | 17       | 93        | 282        | 527        | 303                               | 545                                | 515                                |           |
|        | 4.                                         | 26       | 71        | 598        | 390        | 185                               | 460                                | 283                                |           |
|        | 5.IFN                                      | 10       | 149       | 103        | 436        | 43                                | 178                                | 124                                |           |
|        | Phospholipase A2                           |          |           |            |            |                                   |                                    |                                    |           |

|                                           |       |      |      |      |      |       |      |      |               |
|-------------------------------------------|-------|------|------|------|------|-------|------|------|---------------|
| GCH1                                      | 1.    | 8    | -    | -    | -    | 830   | 184  | 52   |               |
|                                           | 2.    | 14   | -    | -    | -    | 543   | 506  | 107  |               |
|                                           | 3.    | 8    | 21   | 2    | 2    | 363   | 244  | 113  |               |
|                                           | 4.    | 10   | 22   | 4    | 3    | 610   | 114  | 30   |               |
|                                           | 5.IFN | 15   | 43   | 1    | 4    | 257   | 278  | 258  |               |
| GTP cyclohydrolase 1                      |       |      |      |      |      |       |      |      |               |
| OLR1                                      | 1.    | 2    | -    | -    | -    | 1415  | 63   | 105  |               |
|                                           | 2.    | 1    | -    | -    | -    | 194   | 620  | 325  |               |
|                                           | 3.    | 3    | 964  | 168  | 41   | 474   | 124  | 163  |               |
|                                           | 4.    | 0.6  | 878  | 755  | 303  | 1117  | 49   | 119  |               |
|                                           | 5.IFN | 0.5  | 864  | 209  | 88   | 22    | 18   | 11   |               |
| Oxidized low density lipoprotein receptor |       |      |      |      |      |       |      |      |               |
| IDO1                                      | 1.    | 0.1  | -    | -    | -    | 101   | 382  | 279  | 1010x (3820x) |
|                                           | 2.    | 0    | -    | -    | -    | 850   | 270  | 547  |               |
|                                           | 3.    | 0    | 0.2  | 0.4  | 0.3  | 58    | 272  | 143  |               |
|                                           | 4.    | 0.8  | 1.0  | 0.2  | 0.1  | 161   | 1820 | 1595 |               |
|                                           | 5.IFN | 0    | 0.1  | 1.9  | 0.2  | 650   | 4901 | 2867 |               |
| Indole amine 2-3 dioxidase 1              |       |      |      |      |      |       |      |      |               |
| SLAMF7                                    | 1.    | 2    | -    | -    | -    | 2987  | 2136 | 1301 |               |
|                                           | 2.    | 6    | -    | -    | -    | 1385  | 441  | 926  |               |
|                                           | 3.    | 2    | 67   | 16   | 33   | 910   | 433  | 516  |               |
|                                           | 4.    | 31   | 247  | 212  | 120  | 2914  | 2243 | 1033 |               |
|                                           | 5.IFN | 9    | 93   | 24   | 43   | 301   | 1203 | 958  |               |
| SLAM family 7                             |       |      |      |      |      |       |      |      |               |
| SGPP2                                     | 1.    | 0.1  | -    | -    | -    | 701   | 420  | 236  |               |
|                                           | 2.    | 0.1  | -    | -    | -    | 306   | 108  | 201  |               |
|                                           | 3.    | 0    | 5    | 2    | 4    | 747   | 99   | 21   |               |
|                                           | 4.    | 0    | 8    | 4.0  | 1    | 514   | 631  | 386  |               |
|                                           | 5.IFN | 9    | 93   | 24   | 43   | 301   | 1203 | 958  |               |
| Shingosine-1- phosphate Phosphatase 2     |       |      |      |      |      |       |      |      |               |
| SRGN<br>(Serglycin)                       | 1.    | 3855 | -    | -    | -    | 6736  | 1934 | 2185 |               |
|                                           | 2.    | 3641 | -    | -    | -    | 3899  | 2312 | 3170 |               |
|                                           | 3.    | 1310 | 1617 | 287  | 337  | 2431  | 1332 | 1266 |               |
|                                           | 4.    | 5214 | 5595 | 1432 | 1123 | 10261 | 4215 | 3187 |               |
|                                           | 5.IFN | 4756 | 1080 | 961  | 710  | 2326  | 1146 | 1047 |               |
| ZC3HAV1                                   | 1.    | 41   | -    | -    | -    | 968   | 111  | 54   |               |
|                                           | 2.    | 70   | -    | -    | -    | 910   | 1158 | 65   |               |
|                                           | 3.    | 22   | 62   | 37   | 43   | 583   | 29   | 30   |               |
|                                           | 4.    | 47   | 198  | 92   | 119  | 1362  | 234  | 159  |               |
|                                           | 5.IFN | 89   | 120  | 177  | 89   | 876   | 179  | 143  |               |
| Antiviral Zinc finger                     |       |      |      |      |      |       |      |      |               |
| ZC3H12C                                   | 1.    | 2    | -    | -    | -    | 274   | 147  | 112  |               |
|                                           | 2.    | 4    | -    | -    | -    | 215   | 228  | 39   |               |
|                                           | 3.    | 3    | 29   | 24   | 37   | 171   | 38   | 27   |               |
|                                           | 4.    | 3    | 52   | 32   | 59   | 312   | 248  | 118  |               |
|                                           | 5.IFN | 8    | 86   | 30   | 60   | 44    | 69   | 36   |               |
| Zinc finger                               |       |      |      |      |      |       |      |      |               |
| MX2                                       | 1.    | 14   | -    | -    | -    | 338   | 25   | 13   |               |
|                                           | 2.    | 10   | -    | -    | -    | 115   | 200  | 5    |               |
|                                           | 3.    | 20   | 11   | 4    | 7    | 292   | 8    | 5    |               |
|                                           | 4.    | 4    | 2    | 5    | 1    | 126   | 8    | 1    |               |
|                                           | 5.IFN | 2    | 1    | 0    | 1    | 2     | 4    | 4    |               |
| Mvxo-virus resistance                     |       |      |      |      |      |       |      |      |               |

|                                  |              |            |           |            |             |            |            |            |
|----------------------------------|--------------|------------|-----------|------------|-------------|------------|------------|------------|
| <b>MIR155HG</b>                  | <b>1.</b>    | <b>0.1</b> | -         | -          | -           | <b>182</b> | <b>81</b>  | <b>9</b>   |
|                                  | <b>2.</b>    | <b>0.2</b> | -         | -          | -           | <b>387</b> | <b>382</b> | <b>74</b>  |
|                                  | <b>3.</b>    | <b>0</b>   | <b>1</b>  | <b>0</b>   | <b>2</b>    | <b>287</b> | <b>7.6</b> | <b>0.5</b> |
|                                  | <b>4.</b>    | <b>0.1</b> | <b>1</b>  | <b>2</b>   | <b>0.7</b>  | <b>256</b> | <b>174</b> | <b>10</b>  |
|                                  | <b>5.IFN</b> | <b>0.3</b> | <b>3</b>  | <b>0.2</b> | <b>2</b>    | <b>4</b>   | <b>1</b>   | <b>0.1</b> |
| <b>Non coding RNA</b>            |              |            |           |            |             |            |            |            |
| <b>RNASE1</b>                    | <b>1.</b>    | <b>0.6</b> | -         | -          | -           | <b>0.7</b> | <b>1</b>   | <b>3</b>   |
|                                  | <b>2.</b>    | <b>0.2</b> | -         | -          | -           | <b>5</b>   | <b>24</b>  | <b>22</b>  |
|                                  | <b>3.</b>    | <b>0.9</b> | <b>5</b>  | <b>62</b>  | <b>176</b>  | <b>0</b>   | <b>0</b>   | <b>0.6</b> |
|                                  | <b>4.</b>    | <b>0.4</b> | <b>5</b>  | <b>77</b>  | <b>248</b>  | <b>0</b>   | <b>2</b>   | <b>38</b>  |
|                                  | <b>5.IFN</b> | <b>3</b>   | <b>25</b> | <b>784</b> | <b>1894</b> | <b>2</b>   | <b>3</b>   | <b>11</b>  |
| <b>Ribonuclease 1 pancreatic</b> |              |            |           |            |             |            |            |            |



## **Table S5 Proteases and protease inhibitors**

The five different donors are listed as 1-5. Donors 1-4 were treated with 1 ug/ml of *E. coli* LPS and donor 5 with 200 ng/ml of IFN- $\gamma$ . Donor 1 is a male age 51, donor 2 a male age 43, donor 3 a female age 47, donor 4 a male age 28 and donor 5 a female age 61.

| <u>Gene</u>                                                  | <u>0</u> | <u>4h</u> | <u>24h</u> | <u>48h</u> | <u>4h+LPS</u><br>(IFN- $\gamma$ ) | <u>24h+LPS</u><br>(IFN- $\gamma$ ) | <u>48h+LPS</u><br>(IFN- $\gamma$ ) |
|--------------------------------------------------------------|----------|-----------|------------|------------|-----------------------------------|------------------------------------|------------------------------------|
| <b>MMP14</b>                                                 |          |           |            |            |                                   |                                    |                                    |
| 1.                                                           | 6        | -         | -          | -          | 759                               | 4051                               | 3268                               |
| 2.                                                           | 6        | -         | -          | -          | 2002                              | 950                                | 1886                               |
| 3.                                                           | 3        | 28        | 103        | 96         | 659                               | 2442                               | 1333                               |
| 4.                                                           | 7        | 18        | 181        | 193        | 286                               | 3012                               | 2402                               |
| 5.IFN                                                        | 5        | 22        | 133        | 186        | 4                                 | 35                                 | 39                                 |
| Matrix metallo peptidase 14                                  |          |           |            |            |                                   |                                    |                                    |
| <b>CTSS</b>                                                  |          |           |            |            |                                   |                                    |                                    |
| 1.                                                           | 5290     | -         | -          | -          | 1587                              | 930                                | 1194                               |
| 2.                                                           | 5923     | -         | -          | -          | 343                               | 642                                | 452                                |
| 3.                                                           | 1024     | 861       | 818        | 1443       | 366                               | 198                                | 418                                |
| 4.                                                           | 2853     | 559       | 1283       | 1392       | 1724                              | 264                                | 153                                |
| 5.IFN                                                        | 1278     | 455       | 234        | 2056       | 188                               | 965                                | 1428                               |
| Cathepsin S involved in antigen presentation to MHC Class II |          |           |            |            |                                   |                                    |                                    |
| <b>Cystatin C</b>                                            |          |           |            |            |                                   |                                    |                                    |
| 1.                                                           | 3704     | -         | -          | -          | 985                               | 114                                | 142                                |
| 2.                                                           | 4034     | -         | -          | -          | 1197                              | 954                                | 207                                |
| (CST3) 3.                                                    | 2446     | 1905      | 2258       | 3887       | 551                               | 118                                | 283                                |
| 4.                                                           | 4906     | 2961      | 1692       | 2398       | 1316                              | 167                                | 158                                |
| 5.IFN                                                        | 7478     | 2667      | 3147       | 4974       | 3650                              | 1952                               | 2850                               |
| <b>SerpinB2</b>                                              |          |           |            |            |                                   |                                    |                                    |
| 1.                                                           | 38       | -         | -          | -          | 7326                              | 17175                              | 3847                               |
| 2.                                                           | 10       | -         | -          | -          | 7380                              | 350                                | 1880                               |
| 3.                                                           | 1        | 6         | 3          | 3.2        | 928                               | 1459                               | 85                                 |
| 4.                                                           | 5        | 8         | 6          | 0.7        | 1305                              | 3098                               | 1051                               |
| 5.IFN                                                        | 2        | 21        | 0.2        | 5          | 16                                | 0                                  | 0                                  |
| <b>SerpinB9</b>                                              |          |           |            |            |                                   |                                    |                                    |
| 1.                                                           | 111      | -         | -          | -          | 2491                              | 948                                | 276                                |
| 2.                                                           | 59       | -         | -          | -          | 1326                              | 1318                               | 707                                |
| 3.                                                           | 28       | 76        | 7          | 7          | 535                               | 608                                | 353                                |
| 4.                                                           | 16       | 20        | 10         | 1          | 712                               | 35                                 | 8                                  |
| 5.IFN                                                        | 4        | 23        | 0.2        | 4          | 10                                | 14                                 | 6                                  |
| <b>PI3</b>                                                   |          |           |            |            |                                   |                                    |                                    |
| 1.                                                           | 2        | -         | -          | -          | 582                               | 5620                               | 2384                               |
| 2.                                                           | 0        | -         | -          | -          | 43                                | 7                                  | 44                                 |
| 3.                                                           | 2        | 33        | 2.7        | 1.0        | 189                               | 326                                | 221                                |
| 4.                                                           | 0        | 8         | 0          | 0          | 93                                | 2382                               | 1371                               |
| 5.IFN                                                        | 0.4      | 6         | 0          | 0          | 3                                 | 2                                  | 0.7                                |
| Peptidase inhibitor 3 skin derived                           |          |           |            |            |                                   |                                    |                                    |

## **Table S6 CD molecules**

The five different donors are listed as 1-5. Donors 1-4 were treated with 1 ug/ml of *E. coli* LPS and donor 5 with 200 ng/ml of IFN- $\gamma$ . Donor 1 is a male age 51, donor 2 a male age 43, donor 3 a female age 47, donor 4 a male age 28 and donor 5 a female age 61.

| <b>Gene</b>  |       | <b>0</b> | <b>4h</b> | <b>24h</b> | <b>48h</b> | <b>4h+LPS</b><br>(IFN- $\gamma$ ) | <b>24h+LPS</b><br>(IFN- $\gamma$ ) | <b>48h+LPS</b><br>(IFN- $\gamma$ ) |
|--------------|-------|----------|-----------|------------|------------|-----------------------------------|------------------------------------|------------------------------------|
| <b>CD14</b>  | 1.    | 1697     | -         | -          | -          | 574                               | 7300                               | 7946                               |
|              | 2.    | 1633     | -         | -          | -          | 2360                              | 1119                               | 2477                               |
|              | 3.    | 991      | 904       | 2245       | 1780       | 230                               | 6021                               | 7424                               |
|              | 4.    | 1525     | 1010      | 2143       | 1661       | 256                               | 2243                               | 8437                               |
|              | 5.IFN | 3869     | 1596      | 4229       | 2458       | 989                               | 236                                | 531                                |
| <b>CD4</b>   | 1.    | 594      | -         | -          | -          | 88                                | 8                                  | 14                                 |
|              | 2.    | 578      | -         | -          | -          | 4                                 | 24                                 | 6                                  |
|              | 3.    | 81       | 105       | 226        | 274        | 12                                | 2                                  | 17                                 |
|              | 4.    | 564      | 237       | 174        | 614        | 105                               | 14                                 | 10                                 |
|              | 5.IFN | 1422     | 320       | 895        | 1278       | 308                               | 442                                | 802                                |
| <b>CD83</b>  | 1.    | 18       | -         | -          | -          | 565                               | 231                                | 113                                |
|              | 2.    | 18       | -         | -          | -          | 575                               | 350                                | 538                                |
|              | 3.    | 44       | 88        | 53         | 103        | 700                               | 72                                 | 42                                 |
|              | 4.    | 39       | 336       | 186        | 314        | 1054                              | 980                                | 791                                |
|              | 5.IFN | 161      | 362       | 120        | 187        | 809                               | 235                                | 79                                 |
| <b>CD80</b>  | 1.    | 2        | -         | -          | -          | 318                               | 146                                | 56                                 |
|              | 2.    | 0.4      | -         | -          | -          | 252                               | 76                                 | 101                                |
|              | 3.    | 2        | 8         | 3          | 5          | 632                               | 161                                | 70                                 |
|              | 4.    | 1        | 6         | 2          | 0          | 130                               | 165                                | 53                                 |
|              | 5.IFN | 0.8      | 14        | 0.4        | 2          | 51                                | 51                                 | 23                                 |
| <b>CD86</b>  | 1.    | 236      | -         | -          | -          | 78                                | 4                                  | 33                                 |
|              | 2.    | 207      | -         | -          | -          | 20                                | 131                                | 85                                 |
|              | 3.    | 34       | 72        | 40         | 48         | 15                                | 2                                  | 19                                 |
|              | 4.    | 152      | 145       | 67         | 124        | 101                               | 5                                  | 15                                 |
|              | 5.IFN | 108      | 47        | 28         | 82         | 50                                | 97                                 | 114                                |
| <b>CD274</b> | 1.    | 0        | -         | -          | -          | 139                               | 551                                | 214                                |
|              | 2.    | 0.5      | -         | -          | -          | 271                               | 118                                | 150                                |
|              | 3.    | 0.2      | 6         | 3          | 3          | 146                               | 202                                | 166                                |
|              | 4.    | 5        | 8         | 8          | 5          | 247                               | 687                                | 211                                |
|              | 5.IFN | 0.2      | 15        | 5          | 8          | 423                               | 373                                | 253                                |
| <b>CD34</b>  | 1.    | 0.1      | -         | -          | -          | 0                                 | 0                                  | 0                                  |
|              | 2.    | 0        | -         | -          | -          | 0                                 | 0                                  | 0.2                                |
|              | 3.    | 0        | 0         | 0          | 0          | 0                                 | 0                                  | 0.2                                |
|              | 4.    | 0        | 0         | 0.1        | 0.1        | 0.1                               | 0                                  | 0                                  |
|              | 5.IFN | 0        | 0         | 0          | 0          | 0                                 | 0                                  | 0                                  |
| <b>CD19</b>  | 1.    | 0        | -         | -          | -          | 0.1                               | 0.2                                | 2.8                                |
|              | 2.    | 0        | -         | -          | -          | 0                                 | 0.2                                | 0.1                                |
|              | 3.    | 0        | 0         | 0          | 0          | 0                                 | 0                                  | 0                                  |
|              | 4.    | 0        | 0         | 0          | 0          | 0                                 | 0.1                                | 0                                  |
|              | 5.IFN | 0        | 0         | 0          | 0          | 0                                 | 0                                  | 0                                  |

## **Table S7 Immunoglobulin Fc-receptors**

The five different donors are listed as 1-5. Donors 1-4 were treated with 1 ug/ml of *E. coli* LPS and donor 5 with 200 ng/ml of IFN- $\gamma$ . Donor 1 is a male age 51, donor 2 a male age 43, donor 3 a female age 47, donor 4 a male age 28 and donor 5 a female age 61.

| <u>Gene</u> | <u>0</u> | <u>4h</u> | <u>24h</u> | <u>48h</u> | <u>4h+LPS</u><br>(IFN- $\gamma$ ) | <u>24h+LPS</u><br>(IFN- $\gamma$ ) | <u>48h+LPS</u><br>(IFN- $\gamma$ ) |
|-------------|----------|-----------|------------|------------|-----------------------------------|------------------------------------|------------------------------------|
| FCGR2A 1.   | 580      | -         | -          | -          | 343                               | 797                                | 580                                |
| 2.          | 404      | -         | -          | -          | 707                               | 422                                | 716                                |
| 3.          | 55       | 111       | 53         | 46         | 107                               | 258                                | 398                                |
| 4.          | 756      | 3676      | 351        | 398        | 396                               | 899                                | 3456                               |
| 5.IFN       | 1243     | 350       | 3450       | 305        | 469                               | 545                                | 493                                |
| FCGR3A 1.   | 131      | -         | -          | -          | 6                                 | 22                                 | 36                                 |
| 2.          | 93       | -         | -          | -          | 6                                 | 15                                 | 5                                  |
| 3.          | 27       | 123       | 74         | 20         | 6                                 | 3                                  | 62                                 |
| 4.          | 150      | 611       | 403        | 219        | 16                                | 8                                  | 51                                 |
| 5.IFN       | 297      | 207       | 340        | 10         | 207                               | 249                                | 130                                |
| FCGR3B 1.   | 22       | -         | -          | -          | 4                                 | 1                                  | 3                                  |
| 2.          | 1        | -         | -          | -          | 0                                 | 0                                  | 0                                  |
| 3.          | 23       | 15        | 0.4        | 0.6        | 3                                 | 0.5                                | 0                                  |
| 4.          | 3        | 5         | 0.2        | 0          | 0.2                               | 0.4                                | 0                                  |
| 5.IFN       | 6        | 0.3       | 0          | 0.2        | 2                                 | 1                                  | 0.5                                |
| FCERIA 1.   | 7        | -         | -          | -          | 0.3                               | 0.2                                | 0                                  |
| 2.          | 41       | -         | -          | -          | 0                                 | 0                                  | 0                                  |
| 3.          | 5        | 1         | 17         | 32         | 0                                 | 0                                  | 0                                  |
| 4.          | 24       | 10        | 20         | 20         | 1                                 | 0.1                                | 0                                  |
| 5.IFN       | 34       | 6         | 49         | 62         | 4                                 | 0.1                                | 0                                  |
| FCERIG 1.   | 1173     | -         | -          | -          | 1048                              | 3435                               | 3033                               |
| 2.          | 1426     | -         | -          | -          | 4407                              | 3504                               | 3764                               |
| 3.          | 567      | 993       | 845        | 1399       | 549                               | 3675                               | 4134                               |
| 4.          | 2096     | 2724      | 2072       | 2401       | 1721                              | 4966                               | 4665                               |
| 5.IFN       | 2125     | 1526      | 1685       | 2537       | 1360                              | 3120                               | 2888                               |
| FCER2 1.    | 2        | -         | -          | -          | 2                                 | 2                                  | 3                                  |
| (CD23) 2.   | 1        | -         | -          | -          | 2                                 | 1                                  | 1                                  |
| 3.          | 4        | 8         | 3          | 3          | 7                                 | 2                                  | 3                                  |
| 4.          | 0.3      | 3         | 1          | 1          | 1                                 | 2                                  | 3                                  |
| 5.IFN       | 3        | 5         | 0.2        | 1          | 8                                 | 0.3                                | 0.7                                |
| FCGR1A 1.   | 51       | -         | -          | -          | 10                                | 25                                 | 70                                 |
| 2.          | 39       | -         | -          | -          | 8                                 | 3                                  | 7                                  |
| 3.          | 13       | 13        | 7          | 4          | 1                                 | 47                                 | 125                                |
| 4.          | 133      | 89        | 50         | 62         | 56                                | 8                                  | 6                                  |
| 5.IFN       | 60       | 23        | 19         | 16         | 397                               | 705                                | 764                                |
| FCAR 1.     | 92       | -         | -          | -          | 344                               | 426                                | 293                                |
| (CD89) 2.   | 33       | -         | -          | -          | 285                               | 214                                | 287                                |
| 3.          | 27       | 51        | 11         | 4          | 148                               | 276                                | 225                                |
| 4.          | 18       | 34        | 44         | 1          | 213                               | 64                                 | 81                                 |
| 5.IFN       | 11       | 46        | 3          | 1          | 2                                 | 3                                  | 0.4                                |

## Table S8. Cytokines and Chemokines

The five different donors are listed as 1-5. Donors 1-4 were treated with 1 ug/ml of *E. coli* LPS and donor 5 with 200 ng/ml of IFN- $\gamma$ . Donor 1 is a male age 51, donor 2 a male age 43, donor 3 a female age 47, donor 4 a male age 28 and donor 5 a female age 61. The increase at 4 hrs is marked in black and at 24 hrs in red.

| Gene           |       | 0   | 4h  | 24h | 48h | 4h+LPS<br>(IFN- $\gamma$ ) | 24h+LPS<br>(IFN- $\gamma$ ) | 48h+LPS<br>(IFN- $\gamma$ ) | Increase      |
|----------------|-------|-----|-----|-----|-----|----------------------------|-----------------------------|-----------------------------|---------------|
| IL-1a          | 1.    | 0.2 | -   | -   | -   | 2134                       | 1049                        | 421                         | 10670x        |
|                | 2.    | 0.1 | -   | -   | -   | 1735                       | 1920                        | 455                         |               |
|                | 3.    | 0   | 5   | 0.2 | 0   | 1117                       | 388                         | 178                         |               |
|                | 4.    | 0   | 6   | 4   | 0.9 | 2745                       | 1856                        | 744                         |               |
|                | 5.IFN | 0.1 | 26  | 0.2 | 0.6 | 1                          | 0                           | 0.7                         |               |
| IL-1b          | 1.    | 11  | -   | -   | -   | 31674                      | 23094                       | 12926                       | 2879x         |
|                | 2.    | 16  | -   | -   | -   | 32115                      | 31994                       | 18578                       |               |
|                | 3.    | 9   | 62  | 15  | 5   | 10085                      | 12696                       | 6181                        |               |
|                | 4.    | 12  | 72  | 48  | 8   | 43189                      | 31663                       | 14788                       |               |
|                | 5.IFN | 48  | 234 | 2   | 3   | 19                         | 16                          | 4                           |               |
| IL-6           | 1.    | 0.1 | -   | -   | -   | 5850                       | 1717                        | 1071                        | 58500x        |
|                | 2.    | 0.1 | -   | -   | -   | 10270                      | 13580                       | 775                         |               |
|                | 3.    | 0.2 | 2   | 2   | 0.2 | 5712                       | 1775                        | 443                         |               |
|                | 4.    | 0   | 1   | 1   | 0   | 8386                       | 3175                        | 1126                        |               |
|                | 5.IFN | 0.3 | 35  | 0   | 0.1 | 7                          | 0.1                         | 0                           |               |
| TNF-a<br>(TNF) | 1.    | 131 | -   | -   | -   | 2047                       | 310                         | 94                          | 16x           |
|                | 2.    | 91  | -   | -   | -   | 3391                       | 4672                        | 366                         |               |
|                | 3.    | 72  | 67  | 52  | 26  | 1173                       | 61                          | 52                          |               |
|                | 4.    | 86  | 61  | 71  | 45  | 2955                       | 248                         | 74                          |               |
|                | 5.IFN | 295 | 228 | 81  | 44  | 1114                       | 433                         | 202                         |               |
| IL-10          | 1.    | 4   | -   | -   | -   | 42                         | 628                         | 141                         | 10x (157x)    |
|                | 2.    | 0.7 | -   | -   | -   | 211                        | 12                          | 53                          |               |
|                | 3.    | 1   | 6   | 9   | 19  | 36                         | 230                         | 34                          |               |
|                | 4.    | 0.8 | 4   | 31  | 26  | 22                         | 457                         | 100                         |               |
|                | 5.IFN | 0.9 | 4   | 11  | 28  | 0.3                        | 4                           | 7                           |               |
| IL-19          | 1.    | 0.1 | -   | -   | -   | 12                         | 591                         | 70                          | 120x (5910x)  |
|                | 2.    | 0   | -   | -   | -   | 156                        | 5.3                         | 30                          |               |
|                | 3.    | 0   | 0   | 0   | 0   | 25                         | 22                          | 3                           |               |
|                | 4.    | 0   | 0   | 0.3 | 0   | 3                          | 768                         | 76                          |               |
|                | 5.IFN | 0   | 0   | 0   | 0   | 0                          | 0                           | 0                           |               |
| IL-20          | 1.    | 0   | -   | -   | -   | 2                          | 12                          | 5                           | 20x (120x)    |
|                | 2.    | 0   | -   | -   | -   | 3                          | 0                           | 0.2                         |               |
|                | 3.    | 0   | 0.2 | 0   | 0   | 3                          | 0.4                         | 0.3                         |               |
|                | 4.    | 0   | 0   | 0.3 | 0   | 6                          | 58                          | 3.3                         |               |
|                | 5.IFN | 0   | 0   | 0.4 | 0   | 0                          | 0                           | 0                           |               |
| IL-36G         | 1.    | 0   | -   | -   | -   | 342                        | 765                         | 154                         | 3420x (7650x) |
|                | 2.    | 0   | -   | -   | -   | 265                        | 2                           | 24                          |               |
|                | 3.    | 0.2 | 0   | 0   | 0   | 387                        | 96                          | 32                          |               |
|                | 4.    | 0   | 0.5 | 0.2 | 0   | 246                        | 1106                        | 101                         |               |
|                | 5.IFN | 0   | 0   | 0   | 0   | 0.2                        | 0                           | 0                           |               |

|                                                                                         |       |      |      |      |      |      |      |      |                                              |
|-----------------------------------------------------------------------------------------|-------|------|------|------|------|------|------|------|----------------------------------------------|
| IL-12B                                                                                  | 1.    | 0    | 33   | 16   | 11   | 27   | 15   | 5    | No increase in IL12A<br>No increase in IL12A |
|                                                                                         | 2.    | 0.1  | 31   | 34   | 63   | 87   | 12   | 9    |                                              |
|                                                                                         | 3.    | 0    | 0    | 0    | 0    | 14   | 3    | 0.3  |                                              |
|                                                                                         | 4.    | 0    | 0    | 0    | 0    | 30   | 234  | 12   |                                              |
|                                                                                         | 5.IFN | 0    | 0    | 0    | 0    | 0.3  | 0    | 0    |                                              |
| CSF3<br>(G-CSF)                                                                         | 1.    | 0    | -    | -    | -    | 221  | 587  | 241  |                                              |
|                                                                                         | 2.    | 0    | -    | -    | -    | 105  | 143  | 6    |                                              |
|                                                                                         | 3.    | 0    | 0    | 0    | 0    | 316  | 201  | 31   |                                              |
|                                                                                         | 4.    | 0    | 0    | 0    | 0    | 244  | 776  | 356  |                                              |
|                                                                                         | 5.IFN | 0    | 0.2  | 0    | 0    | 0    | 0    | 0    |                                              |
| TGFB1<br>(Induced)                                                                      | 1.    | 1297 | -    | -    | -    | 206  | 18   | 211  | Down regulated (72x)                         |
|                                                                                         | 2.    | 778  | -    | -    | -    | 171  | 187  | 202  |                                              |
|                                                                                         | 3.    | 287  | 2096 | 2217 | 1194 | 98   | 92   | 414  |                                              |
|                                                                                         | 4.    | 739  | 1461 | 3597 | 2959 | 200  | 21   | 95   |                                              |
|                                                                                         | 5.IFN | 1129 | 1180 | 3672 | 992  | 3722 | 2204 | 2147 |                                              |
| IL1RN<br>IL-1 receptor antagonist                                                       | 1.    | 55   | -    | -    | -    | 1482 | 1421 | 561  |                                              |
|                                                                                         | 2.    | 27   | -    | -    | -    | 1406 | 1171 | 1237 |                                              |
|                                                                                         | 3.    | 17   | 16   | 5    | 38   | 273  | 186  | 156  |                                              |
|                                                                                         | 4.    | 38   | 45   | 53   | 128  | 1196 | 787  | 251  |                                              |
|                                                                                         | 5.IFN | 45   | 34   | 9    | 38   | 27   | 184  | 84   |                                              |
| TNIP3<br>TNFAIP3 interacting protein, Inhibits NFkB activation by TNF-a, IL-1 and TLR-4 | 1.    | 0.2  | -    | -    | -    | 765  | 1882 | 760  |                                              |
|                                                                                         | 2.    | 0    | -    | -    | -    | 525  | 182  | 307  |                                              |
|                                                                                         | 3.    | 0    | 1    | 0.8  | 0    | 188  | 573  | 529  |                                              |
|                                                                                         | 4.    | 0    | 3    | 3    | 0.2  | 498  | 714  | 366  |                                              |
|                                                                                         | 5.IFN | 0.1  | 2    | 0.4  | 0.1  | 1    | 0.1  | 0.3  |                                              |

No expression of IL-2, IL-3, IL-4, IL-5, IL-9, IL-21, IL-22, IL-25, IL-36, IL-28, IL-31, IL-33, IL-34, IL-36A, IL-36B and IL-37. In a few a very minor expression at 48 h +LPS.

|      |       |      |     |      |     |       |       |       |                             |
|------|-------|------|-----|------|-----|-------|-------|-------|-----------------------------|
| IL-8 | 1.    | 1202 | -   | -    | -   | 43405 | 38170 | 44709 | 36x                         |
|      | 2.    | 174  | -   | -    | -   | 55515 | 52850 | 27652 |                             |
|      | 3.    | 1034 | 727 | 149  | 88  | 36945 | 21832 | 10355 |                             |
|      | 4.    | 176  | 181 | 741  | 76  | 46829 | 24100 | 12508 |                             |
|      | 5.IFN | 129  | 587 | 19   | 48  | 52    | 9     | 1     |                             |
| CCL1 | 1.    | 0    | -   | -    | -   | 3     | 6     | 7     | 30x (60x)<br>17870 (15040x) |
|      | 2.    | 0    | -   | -    | -   | 1787  | 1504  | 1974  |                             |
|      | 3.    | 0    | 0   | 0.6  | 0   | 2     | 0.5   | 0.6   |                             |
|      | 4.    | 0    | 0.5 | 0.8  | 0   | 9     | 649   | 587   |                             |
|      | 5.IFN | 0    | 0.3 | 0.6  | 0   | 0.9   | 0.3   | 0     |                             |
| CCL2 | 1.    | 2    | -   | -    | -   | 1143  | 22852 | 24177 | 571x (11426x)               |
|      | 2.    | 2    | -   | -    | -   | 11791 | 4575  | 10308 |                             |
|      | 3.    | 6    | 155 | 98   | 136 | 6235  | 13541 | 12482 |                             |
|      | 4.    | 2    | 278 | 1313 | 403 | 1336  | 19071 | 18286 |                             |
|      | 5.IFN | 16   | 408 | 213  | 64  | 1707  | 524   | 117   |                             |
| CCL3 | 1.    | 9    | -   | -    | -   | 8722  | 9090  | 3458  | 969x                        |
|      | 2.    | 14   | -   | -    | -   | 12384 | 15015 | 2645  |                             |
|      | 3.    | 11   | 37  | 24   | 24  | 9660  | 2372  | 556   |                             |
|      | 4.    | 7    | 13  | 33   | 16  | 11498 | 5280  | 1000  |                             |
|      | 5.IFN | 18   | 64  | 2    | 17  | 12    | 6     | 3     |                             |

|        |       |     |     |     |     |       |       |      |              |
|--------|-------|-----|-----|-----|-----|-------|-------|------|--------------|
| CCL3L3 | 1.    | 2   | -   | -   | -   | 774   | 1288  | 408  | 387x         |
|        | 2.    | 0.6 | -   | -   | -   | 1016  | 1159  | 161  |              |
|        | 3.    | 2   | 8   | 3   | 2   | 1868  | 332   | 57   |              |
|        | 4.    | 5   | 30  | 6   | 3   | 2877  | 3669  | 2549 |              |
|        | 5.IFN | 18  | 20  | 6   | 2   | 12    | 1     | 21   |              |
| CCL4   | 1.    | 3   | -   | -   | -   | 16893 | 6716  | 2349 | 5631x        |
|        | 2.    | 3   | -   | -   | -   | 22220 | 25169 | 2583 |              |
|        | 3.    | 1   | 27  | 12  | 20  | 10084 | 1394  | 442  |              |
|        | 4.    | 4   | 58  | 33  | 29  | 20638 | 9367  | 3106 |              |
|        | 5.IFN | 8   | 439 | 54  | 42  | 203   | 34    | 14   |              |
| CCL5   | 1.    | 8   | -   | -   | -   | 450   | 60    | 39   | 56x          |
|        | 2.    | 7   | -   | -   | -   | 416   | 461   | 52   |              |
|        | 3.    | 4   | 3   | 3   | 4   | 140   | 8     | 8    |              |
|        | 4.    | 15  | 32  | 49  | 31  | 541   | 94    | 87   |              |
|        | 5.IFN | 13  | 13  | 17  | 54  | 6     | 12    | 5.2  |              |
| CCL7   | 1.    | 0.3 | -   | -   | -   | 288   | 1108  | 1265 | 960x (3693x) |
|        | 2.    | 0.4 | -   | -   | -   | 408   | 319   | 630  |              |
|        | 3.    | 0.2 | 5   | 0   | 0   | 126   | 86    | 140  |              |
|        | 4.    | 0.3 | 88  | 15  | 1   | 272   | 881   | 975  |              |
|        | 5.IFN | 1   | 43  | 0.6 | 0.1 | 139   | 2     | 0    |              |
| CCL8   | 1.    | 0   | -   | -   | -   | 39    | 55    | 40   | 390x (550x)  |
|        | 2.    | 0   | -   | -   | -   | 20    | 1     | 4    |              |
|        | 3.    | 0   | 0.5 | 0   | 0.2 | 12    | 6     | 4    |              |
|        | 4.    | 0   | 0   | 0.2 | 0   | 3     | 4     | 1    |              |
|        | 5.IFN | 0   | 2   | 6   | 42  | 0.2   | 0     | 0    |              |
| CCL13  | 1.    | 0   | -   | -   | -   | 0.3   | 12    | 12   | 3x (120x)    |
|        | 2.    | 0   | -   | -   | -   | 20    | 13    | 22   |              |
|        | 3.    | 0   | 0   | 0   | 0   | 0     | 0.9   | 0.5  |              |
|        | 4.    | 0   | 0   | 0   | 0.1 | 0.4   | 24    | 75   |              |
|        | 5.IFN | 0   | 0   | 0.6 | 0   | 5     | 3     | 0.7  |              |
| CCL15  | 1.    | 0   | -   | -   | -   | 51    | 15    | 1    | 510x         |
|        | 2.    | 0.1 | -   | -   | -   | 72    | 65    | 6    |              |
|        | 3.    | 0   | 0   | 0   | 0   | 11    | 0.4   | 0    |              |
|        | 4.    | 0   | 0   | 0   | 0   | 0     | 48    | 27   |              |
|        | 5.IFN | 0   | 1   | 0   | 0   | 1     | 0     | 0    |              |
| CCL18  | 1.    | 0   | -   | -   | -   | 76    | 355   | 87   | 760x (3550x) |
|        | 2.    | 0   | -   | -   | -   | 18    | 14    | 13   |              |
|        | 3.    | 0   | 0.5 | 0   | 0.5 | 18    | 25    | 11   |              |
|        | 4.    | 0   | 27  | 1   | 4   | 68    | 180   | 55   |              |
|        | 5.IFN | 0   | 4   | 4   | 8   | 26    | 13    | 4    |              |
| CCL19  | 1.    | 0   | -   | -   | -   | 3     | 103   | 43   | 30x (1030x)  |
|        | 2.    | 0.1 | -   | -   | -   | 52    | 29    | 24   |              |
|        | 3.    | 0.3 | 0   | 0   | 0   | 2     | 39    | 17   |              |
|        | 4.    | 0   | 0   | 0.2 | 0   | 2     | 67    | 39   |              |
|        | 5.IFN | 0.1 | 0.4 | 0   | 0   | 0     | 1     | 0.6  |              |
| CCL20  | 1.    | 0.4 | -   | -   | -   | 2662  | 269   | 194  | 6655x        |
|        | 2.    | 0.2 | -   | -   | -   | 3680  | 4151  | 208  |              |
|        | 3.    | 0   | 2   | 0.2 | 0   | 3515  | 256   | 63   |              |
|        | 4.    | 0   | 0   | 1   | 0.5 | 5585  | 539   | 49   |              |
|        | 5.IFN | 0.1 | 5   | 0   | 0   | 0.6   | 0     | 0.4  |              |

|                                                                                      |       |     |     |     |     |       |       |       |               |
|--------------------------------------------------------------------------------------|-------|-----|-----|-----|-----|-------|-------|-------|---------------|
| CCL21                                                                                | 1.    | 0   | -   | -   | -   | 3     | 0.5   | 17    | 30x (5x)      |
|                                                                                      | 2.    | 0   | -   | -   | -   | 0     | 0     | 0.1   |               |
|                                                                                      | 3.    | 0   | 0   | 0.2 | 0   | 0     | 0.2   | 0.3   |               |
|                                                                                      | 4.    | 0   | 0   | 0.2 | 0   | 0.1   | 0     | 0     |               |
|                                                                                      | 5.IFN | 0   | 0.3 | 0   | 0   | 0     | 0.1   | 0     |               |
| CCL22                                                                                | 1.    | 0   | -   | -   | -   | 31    | 209   | 112   | 310x (2090x)  |
|                                                                                      | 2.    | 0.1 | -   | -   | -   | 5979  | 8926  | 11219 |               |
|                                                                                      | 3.    | 0.2 | 0.7 | 2   | 6   | 13    | 25    | 12    |               |
|                                                                                      | 4.    | 0   | 11  | 9   | 5   | 109   | 1113  | 571   |               |
|                                                                                      | 5.IFN | 0.6 | 15  | 18  | 24  | 4     | 4     | 0.9   |               |
| CCL23                                                                                | 1.    | 0.2 | -   | -   | -   | 37    | 32    | 6     | 185x          |
|                                                                                      | 2.    | 0.4 | -   | -   | -   | 15    | 4     | 2     |               |
|                                                                                      | 3.    | 0   | 0   | 0.8 | 0   | 24    | 21    | 7     |               |
|                                                                                      | 4.    | 0.1 | 1   | 0.2 | 0.9 | 31    | 32    | 12    |               |
|                                                                                      | 5.IFN | 0.1 | 1   | 1   | 0.5 | 2     | 0.7   | 0     |               |
| CCL24                                                                                | 1.    | 0.8 | -   | -   | -   | 8     | 179   | 283   | 10x (224x)    |
|                                                                                      | 2.    | 0.6 | -   | -   | -   | 10974 | 15748 | 12733 | 18290x        |
|                                                                                      | 3.    | 0   | 3   | 22  | 9   | 16    | 17    | 50    |               |
|                                                                                      | 4.    | 0.1 | 4   | 157 | 5   | 8     | 3557  | 4104  |               |
|                                                                                      | 5.IFN | 1   | 36  | 300 | 23  | 3     | 4     | 0     |               |
| CCL27                                                                                | 1.    | 0.1 | -   | -   | -   | 0     | 0     | 1.2   | -             |
|                                                                                      | 2.    | 0   | -   | -   | -   | 0     | 0     | 0     |               |
|                                                                                      | 3.    | 0   | 0   | 0.2 | 0   | 0     | 0     | 0     |               |
|                                                                                      | 4.    | 0   | 0   | 0   | 0   | 0     | 0     | 0     |               |
|                                                                                      | 5.IFN | 0   | 0   | 0   | 0   | 0     | 0     | 0     |               |
| No or very low expression of CCL11, CCL14, CCL16, CCL17, CCL25, CCL26, CCL27, CCL28. |       |     |     |     |     |       |       |       |               |
| CXCL1                                                                                | 1.    | 4   | -   | -   | -   | 1249  | 6646  | 6196  | 312x (1661x)  |
|                                                                                      | 2.    | 2   | -   | -   | -   | 3525  | 523   | 1089  |               |
|                                                                                      | 3.    | 4   | 23  | 7   | 3   | 2572  | 8503  | 7648  |               |
|                                                                                      | 4.    | 0.4 | 0.7 | 3   | 0.1 | 190   | 228   | 227   |               |
|                                                                                      | 5.IFN | 0   | 3   | 0.2 | 0.3 | 3     | 0     | 0     |               |
| CXCL2                                                                                | 1.    | 12  | -   | -   | -   | 1763  | 1615  | 702   | 147x          |
|                                                                                      | 2.    | 3   | -   | -   | -   | 1006  | 95    | 222   |               |
|                                                                                      | 3.    | 6   | 35  | 76  | 108 | 5819  | 2331  | 970   |               |
|                                                                                      | 4.    | 3   | 4   | 27  | 4   | 1367  | 3001  | 58    |               |
|                                                                                      | 5.IFN | 0.7 | 20  | 2   | 21  | 0.8   | 0.8   | 0.7   |               |
| CXCL3                                                                                | 1.    | 0.3 | -   | -   | -   | 749   | 2306  | 1863  | 2497x (7687x) |
|                                                                                      | 2.    | 0.2 | -   | -   | -   | 2907  | 464   | 1640  |               |
|                                                                                      | 3.    | 0.3 | 17  | 20  | 25  | 1833  | 3836  | 2825  |               |
|                                                                                      | 4.    | 0.7 | 5   | 19  | 7   | 1771  | 3421  | 1722  |               |
|                                                                                      | 5.IFN | 1   | 69  | 8   | 27  | 7     | 0.1   | 0     |               |
| CXCL5                                                                                | 1.    | 0   | -   | -   | -   | 32    | 6651  | 13897 | 320x (66510x) |
|                                                                                      | 2.    | 0.2 | -   | -   | -   | 10768 | 7542  | 12612 |               |
|                                                                                      | 3.    | 0.5 | 2   | 6   | 0.3 | 45    | 13957 | 15443 |               |
|                                                                                      | 4.    | 0.4 | 0.7 | 5   | 0.6 | 16    | 3097  | 4329  |               |
|                                                                                      | 5.IFN | 0   | 4   | 0.2 | 0.4 | 0.2   | 0     | 0     |               |

|        |       |     |      |     |     |      |      |      |            |
|--------|-------|-----|------|-----|-----|------|------|------|------------|
| CXCL6  | 1.    | 0.1 | -    | -   | -   | 4    | 70   | 88   | 40x (700x) |
|        | 2.    | 0   | -    | -   | -   | 473  | 37   | 105  |            |
|        | 3.    | 0.2 | 3    | 0.8 | 0   | 16   | 1075 | 312  |            |
|        | 4.    | 0.6 | 0.2  | 2   | 0.7 | 2    | 113  | 118  |            |
|        | 5.IFN | 0.2 | 2    | 0.4 | 0.1 | 2    | 0    | 0    |            |
| CXCL10 | 1.    | 0.2 | -    | -   | -   | 192  | 0.6  | 0    | 960x       |
|        | 2.    | 0.8 | -    | -   | -   | 106  | 283  | 0.1  |            |
|        | 3.    | 1   | 5    | 0   | 0.3 | 157  | 0    | 0    |            |
|        | 4.    | 4   | 1    | 0.2 | 0   | 151  | 0.1  | 0    |            |
|        | 5.IFN | 2   | 21   | 0.4 | 0.4 | 1554 | 1619 | 855  |            |
| CXCL11 | 1.    | 0   | -    | -   | -   | 11   | 0    | 0    | 110x       |
|        | 2.    | 0.6 | -    | -   | -   | 0.1  | 0    | 0    |            |
|        | 3.    | 0.7 | 0.3  | 0   | 0   | 30   | 0.4  | 0    |            |
|        | 4.    | 2   | 2    | 0   | 0   | 40   | 2    | 0    |            |
|        | 5.IFN | 0.2 | 4    | 0.6 | 0   | 1494 | 363  | 83   |            |
| CXCL16 | 1.    | 307 | -    | -   | -   | 196  | 199  | 509  | -          |
|        | 2.    | 134 | -    | -   | -   | 1033 | 1124 | 1213 |            |
|        | 3.    | 55  | 231  | 67  | 43  | 57   | 125  | 362  |            |
|        | 4.    | 432 | 1063 | 310 | 276 | 332  | 495  | 1089 |            |
|        | 5.IFN | 294 | 972  | 441 | 164 | 1838 | 669  | 349  |            |
| IRAK2  | 1.    | 5   | -    | -   | -   | 302  | 222  | 89   |            |
|        | 2.    | 3   | -    | -   | -   | 82   | 25   | 51   |            |
|        | 3.    | 4   | 29   | 4   | 3   | 557  | 139  | 50   |            |
|        | 4.    | 34  | 14   | 8   | 2   | 242  | 129  | 40   |            |
|        | 5.IFN | 5   | 46   | 2   | 4   | 10   | 3    | 0.3  |            |
| INHBA  | 1.    | 1   | -    | -   | -   | 80   | 761  | 304  | -          |
|        | 2.    | 0   | -    | -   | -   | 1745 | 425  | 906  |            |
|        | 3.    | 0.2 | 0.7  | 0.2 | 0.6 | 254  | 100  | 20   |            |
|        | 4.    | 0   | 0    | 2   | 0   | 165  | 1410 | 708  |            |
|        | 5.IFN | 0.2 | 0.7  | 0.2 | 0   | b5   | 6    | 3    |            |

Inhibin Beta A

No expression (or increase) of CXCL6, CXCL9, CXCL12, CXCL13, CXCL14, CXCL17.



## Table S9 Cytokine and other receptors

The five different donors are listed as 1-5. Donors 1-4 were treated with 1 ug/ml of *E. coli* LPS and donor 5 with 200 ng/ml of IFN- $\gamma$ . Donor 1 is a male age 51, donor 2 a male age 43, donor 3 a female age 47, donor 4 a male age 28 and donor 5 a female age 61.

| Gene                  | 0   | 4h  | 24h | 48h | 4h+LPS<br>(IFN- $\gamma$ ) | 24h+LPS<br>(IFN- $\gamma$ ) | 48h+LPS<br>(IFN- $\gamma$ ) |
|-----------------------|-----|-----|-----|-----|----------------------------|-----------------------------|-----------------------------|
| IL15RA1.              | 14  | -   | -   | -   | 92                         | 33                          | 13                          |
| 2.                    | 29  | -   | -   | -   | 52                         | 13                          | 21                          |
| 3.                    | 25  | 15  | 2   | 6   | 289                        | 52                          | 12                          |
| 4.                    | 28  | 4   | 2   | 2   | 101                        | 70                          | 23                          |
| 5.IFN                 | 15  | 6   | 0.2 | 2   | 80                         | 60                          | 36                          |
| IL7R                  |     |     |     |     |                            |                             |                             |
| 1.                    | 0.7 | -   | -   | -   | 490                        | 1561                        | 792                         |
| 2.                    | 2   | -   | -   | -   | 598                        | 650                         | 605                         |
| 3.                    | 2   | 4   | 5   | 8   | 141                        | 383                         | 210                         |
| 4.                    | 4   | 14  | 28  | 35  | 422                        | 963                         | 329                         |
| 5.IFN                 | 3   | 15  | 12  | 58  | 4                          | 7                           | 5                           |
| IL2RA                 |     |     |     |     |                            |                             |                             |
| 1.                    | 0.1 | -   | -   | -   | 52                         | 342                         | 71                          |
| 2.                    | 0   | -   | -   | -   | 383                        | 66                          | 135                         |
| 3.                    | 0   | 0.2 | 0   | 0   | 67                         | 333                         | 38                          |
| 4.                    | 0   | 3   | 1   | 0.6 | 70                         | 673                         | 331                         |
| 5.IFN                 | 0.3 | 0.6 | 1   | 0.9 | 76                         | 2                           | 3                           |
| IL10RA1.              | 609 | -   | -   | -   | 264                        | 153                         | 243                         |
| 2.                    | 443 | -   | -   | -   | 295                        | 330                         | 274                         |
| 3.                    | 357 | 531 | 406 | 313 | 420                        | 349                         | 477                         |
| 4.                    | 422 | 222 | 198 | 115 | 281                        | 158                         | 151                         |
| 5.IFN                 | 237 | 237 | 126 | 171 | 175                        | 180                         | 115                         |
| IL17RA1.              | 225 | -   | -   | -   | 53                         | 353                         | 340                         |
| 2.                    | 111 | -   | -   | -   | 205                        | 339                         | 334                         |
| 3.                    | 256 | 211 | 207 | 99  | 62                         | 263                         | 247                         |
| 4.                    | 158 | 147 | 302 | 189 | 59                         | 178                         | 224                         |
| 5.IFN                 | 383 | 281 | 272 | 230 | 226                        | 314                         | 357                         |
| CCR7                  |     |     |     |     |                            |                             |                             |
| 1.                    | 0.6 | -   | -   | -   | 223                        | 208                         | 125                         |
| 2.                    | 0.7 | -   | -   | -   | 425                        | 404                         | 798                         |
| 3.                    | 0   | 4   | 0.6 | 3   | 53                         | 27                          | 27                          |
| 4.                    | 0.8 | 14  | 6   | 5   | 391                        | 780                         | 726                         |
| 5.IFN                 | 1   | 13  | 10  | 19  | 6                          | 4                           | 2                           |
| ADORA2A               |     |     |     |     |                            |                             |                             |
| 1.                    | 14  | -   | -   | -   | 666                        | 566                         | 413                         |
| 2.                    | 4   | -   | -   | -   | 404                        | 403                         | 270                         |
| 3.                    | 9   | 14  | 2   | 0.5 | 476                        | 287                         | 200                         |
| 4.                    | 4   | 8   | 3   | 0.5 | 348                        | 268                         | 171                         |
| 5.IFN                 | 5   | 29  | 0.6 | 0.9 | 6                          | 0.9                         | 1                           |
| Adenosine receptor A2 |     |     |     |     |                            |                             |                             |

# **Table S10    Genes upregulated by IFN- $\gamma$**

| <u>Gene</u>                                                            | <u>0</u>  | <u>4h</u> | <u>24h</u> | <u>48h</u> | <u>4h+IFN-<math>\gamma</math></u> | <u>24h+IFN-<math>\gamma</math></u> | <u>48h+IFN-<math>\gamma</math></u> |
|------------------------------------------------------------------------|-----------|-----------|------------|------------|-----------------------------------|------------------------------------|------------------------------------|
| <b>GBP1</b><br>(Guanylate binding IFN induced)                         | 5.IFN 6   | 18        | 3          | 3          | 670                               | 1328                               | 813                                |
| <b>GBP5</b><br>(Guanylate binding IFN induced)                         | 5.IFN 34  | 19        | 4          | 9          | 6018                              | 3915                               | 3153                               |
| <b>C1QB</b>                                                            | 5.IFN 13  | 4         | 73         | 266        | 85                                | 873                                | 2709                               |
| <b>IDO1</b><br>Indole amine 2-3 dioxidase 1                            | 5.IFN 0   | 0.1       | 2          | 0.2        | 650                               | 4901                               | 2867                               |
| <b>WARS</b><br>(Aralkylam. N-acetyl transferase)                       | 5.IFN 519 | 310       | 45         | 85         | 3976                              | 2746                               | 2522                               |
| <b>RSAD2</b><br>(Viperin Virus inh.)                                   | 5.IFN 4   | 35        | 4          | 1          | 654                               | 467                                | 412                                |
| <b>CCL7</b>                                                            | 5.IFN 1   | 43        | 0.6        | 0.1        | 139                               | 2                                  | 0                                  |
| <b>CXCL9</b>                                                           | 5.IFN 3   | 1         | 1          | 1          | 632                               | 6084                               | 4671                               |
| <b>CXCL10</b>                                                          | 5.IFN 2   | 21        | 0.4        | 0.4        | 1554                              | 1619                               | 855                                |
| <b>CXCL11</b>                                                          | 5.IFN 0.2 | 4         | 0.6        | 0          | 1494                              | 363                                | 83                                 |
| <b>SLAMF7</b><br>(SLAM family member 7    Plasma cell marker CD319)    | 5.IFN 9   | 93        | 24         | 43         | 301                               | 1203                               | 958                                |
| <b>SLAMF8</b><br>(CD2 family member involved in lymphocyte activation) | 5.IFN 2   | 18        | 199        | 220        | 607                               | 1076                               | 1105                               |
| <b>ANKRD22</b><br>(Ankyrin repeat domain 22 )                          | 5.IFN 2   | 1         | 0.2        | 0.5        | 499                               | 796                                | 566                                |
| <b>APOL1</b><br>(Apolipoprotein like 1)                                | 5.IFN 8   | 8         | 6          | 8          | 184                               | 158                                | 214                                |
| <b>APOL4</b><br>(Apolipoprotein like 4)                                | 5.IFN 0.2 | 0.6       | 0          | 0.7        | 254                               | 319                                | 315                                |
| <b>SERPING1</b><br>(Protease Inh.)                                     | 5.IFN 15  | 3         | 5          | 14         | 215                               | 1539                               | 2732                               |
| <b>VAMP5</b><br>(Vesicle-associated membrane protein 5 )               | 5.IFN 16  | 2         | 4          | 4          | 209                               | 264                                | 286                                |
| <b>HAPLN3</b><br>(hyaluronan and proteoglycan link protein 3)          | 5.IFN 0.9 | 5         | 0.8        | 1          | 136                               | 253                                | 249                                |
| <b>IL27</b>                                                            | 5.IFN 12  | 3         | 0.4        | 0.9        | 129                               | 74                                 | 61                                 |
| <b>ETV7</b><br>(Transcription factor ETV7)                             | 5.IFN 0.1 | 0.5       | 0.2        | 0          | 116                               | 72                                 | 60                                 |
| <b>P2RY14</b><br>(P2Y purino receptor 14)                              | 5.IFN 0.5 | 0         | 0          | 0          | 46                                | 137                                | 158                                |

## **Table S11 Additional Cytokines and Chemokines**

The five different donors are listed as 1-5. Donors 1-4 were treated with 1 ug/ml of *E. coli* LPS and donor 5 with 200 ng/ml of IFN- $\gamma$ . Donor 1 is a male age 51, donor 2 a male age 43, donor 3 a female age 47, donor 4 a male age 28 and donor 5 a female age 61. The increase at 4 hrs is marked in black and at 24 hrs in red.

| <u>Gene</u> |       | <u>0</u> | <u>4h</u> | <u>24h</u> | <u>48h</u> | <u>4h+LPS</u><br>(IFN- $\gamma$ ) | <u>24h+LPS</u><br>(IFN- $\gamma$ ) | <u>48h+LPS</u><br>(IFN- $\gamma$ ) | <u>Increase</u> |
|-------------|-------|----------|-----------|------------|------------|-----------------------------------|------------------------------------|------------------------------------|-----------------|
| IL-2        | 1.    | 0        | -         | -          | -          | 0                                 | 0                                  | 0.7                                |                 |
|             | 2.    | 0        | -         | -          | -          | 0                                 | 0                                  | 0                                  |                 |
|             | 3.    | 0        | 0         | 0          | 0          | 0                                 | 0                                  | 0                                  |                 |
|             | 4.    | 0        | 0         | 0          | 0          | 0                                 | 0                                  | 0                                  |                 |
|             | 5.IFN | 0        | 0         | 0          | 0          | 0                                 | 0                                  | 0                                  |                 |
| IL-3        | 1.    | 0        | -         | -          | -          | 0                                 | 0                                  | 6                                  |                 |
|             | 2.    | 0        | -         | -          | -          | 0                                 | 0                                  | 0                                  |                 |
|             | 3.    | 0        | 0         | 0          | 0          | 0                                 | 0                                  | 0.2                                |                 |
|             | 4.    | 0        | 0         | 0          | 0          | 0                                 | 0                                  | 0                                  |                 |
|             | 5.IFN | 0        | 0         | 0          | 0          | 0                                 | 0                                  | 0                                  |                 |
| IL-4        | 1.    | 0        | -         | -          | -          | 0                                 | 0                                  | 0                                  |                 |
|             | 2.    | 0        | -         | -          | -          | 0                                 | 0                                  | 0                                  |                 |
|             | 3.    | 0        | 0         | 0          | 0          | 0                                 | 0                                  | 0                                  |                 |
|             | 4.    | 0        | 0         | 0          | 0          | 0                                 | 0.3                                | 0                                  |                 |
|             | 5.IFN | 0        | 0         | 0          | 0          | 0                                 | 0                                  | 0                                  |                 |
| IL-5        | 1.    | 0        | -         | -          | -          | 0.1                               | 0                                  | 8                                  |                 |
|             | 2.    | 0        | -         | -          | -          | 0                                 | 0                                  | 0                                  |                 |
|             | 3.    | 0        | 0         | 0          | 0          | 0                                 | 0                                  | 0                                  |                 |
|             | 4.    | 0        | 0         | 0          | 0          | 0                                 | 0                                  | 0                                  |                 |
|             | 5.IFN | 0        | 0         | 0          | 0.1        | 0                                 | 0                                  | 0                                  |                 |
| IL-9        | 1.    | 0        | -         | -          | -          | 0.3                               | 0                                  | 0                                  |                 |
|             | 2.    | 0        | -         | -          | -          | 0.1                               | 0                                  | 0                                  |                 |
|             | 3.    | 0        | 0         | 0          | 0.8        | 0                                 | 0                                  | 0                                  |                 |
|             | 4.    | 0        | 0         | 0          | 0          | 0.1                               | 0                                  | 0                                  |                 |
|             | 5.IFN | 0        | 0         | 0          | 0          | 0                                 | 0                                  | 0                                  |                 |
| IL-21       | 1.    | 0        | -         | -          | -          | 0                                 | 0                                  | 0                                  |                 |
|             | 2.    | 0        | -         | -          | -          | 0                                 | 0                                  | 0                                  |                 |
|             | 3.    | 0        | 0         | 0          | 0          | 0                                 | 0                                  | 0                                  |                 |
|             | 4.    | 0        | 0         | 0          | 0.1        | 0                                 | 0                                  | 0                                  |                 |
|             | 5.IFN | 0        | 0         | 0          | 0          | 0                                 | 0                                  | 0                                  |                 |
| IL-22       | 1.    | 0        | -         | -          | -          | 0                                 | 0                                  | 0.2                                |                 |
|             | 2.    | 0        | -         | -          | -          | 0                                 | 0                                  | 0                                  |                 |
|             | 3.    | 0.5      | 0         | 0          | 0          | 0                                 | 0                                  | 0                                  |                 |
|             | 4.    | 0        | 0         | 0          | 0          | 0                                 | 0                                  | 0                                  |                 |
|             | 5.IFN | 0        | 0         | 0          | 0          | 0.2                               | 0                                  | 0                                  |                 |
| IL-25       | 1.    | 0        | -         | -          | -          | 0.1                               | 0                                  | 9                                  |                 |
|             | 2.    | 0        | -         | -          | -          | 0                                 | 0                                  | 0                                  |                 |
|             | 3.    | 0        | 0         | 0          | 0          | 0                                 | 0                                  | 0                                  |                 |
|             | 4.    | 0        | 0         | 0          | 0          | 0                                 | 0                                  | 0                                  |                 |
|             | 5.IFN | 0        | 0         | 0          | 0          | 0                                 | 0                                  | 0                                  |                 |

|       |       |     |   |   |     |     |     |     |
|-------|-------|-----|---|---|-----|-----|-----|-----|
| IL-28 | 1.    | 0   | - | - | -   | 0   | 0   | 1   |
|       | 2.    | 0.2 | - | - | -   | 0.1 | 0   | 0   |
|       | 3.    | 0   | 0 | 0 | 0   | 0   | 0   | 0   |
|       | 4.    | 0.8 | 0 | 0 | 0   | 0   | 0   | 0   |
|       | 5.IFN | 0   | 0 | 0 | 0   | 0   | 0   | 0   |
| IL-31 | 1.    | 0   | - | - | -   | 0   | 0   | 0   |
|       | 2.    | 0   | - | - | -   | 0   | 0   | 0   |
|       | 3.    | 0   | 0 | 0 | 0   | 0   | 0   | 0   |
|       | 4.    | 0   | 0 | 0 | 0   | 0   | 0   | 0   |
|       | 5.IFN | 0   | 0 | 0 | 0   | 0   | 0   | 0   |
| IL-33 | 1.    | 0   | - | - | -   | 0   | 0   | 0   |
|       | 2.    | 0   | - | - | -   | 0   | 0   | 0.1 |
|       | 3.    | 0   | 0 | 0 | 0   | 0   | 0   | 0   |
|       | 4.    | 0   | 0 | 0 | 0   | 0   | 0   | 0   |
|       | 5.IFN | 0   | 0 | 0 | 0   | 0   | 0   | 0   |
| IL-34 | 1.    | 0   | - | - | -   | 0.1 | 0   | 2   |
|       | 2.    | 0   | - | - | -   | 0   | 0   | 0   |
|       | 3.    | 0   | 0 | 0 | 0   | 0   | 0   | 0   |
|       | 4.    | 0   | 0 | 0 | 0   | 0   | 0   | 0   |
|       | 5.IFN | 0   | 0 | 0 | 0   | 0   | 0   | 0   |
| IL-37 | 1.    | 0   | - | - | -   | 0.9 | 1   | 0.2 |
|       | 2.    | 0   | - | - | -   | 0.3 | 0.5 | 0.6 |
|       | 3.    | 0   | 0 | 0 | 0.3 | 5   | 0.7 | 0.6 |
|       | 4.    | 0   | 0 | 0 | 0.1 | 2   | 0.1 | 0.4 |
|       | 5.IFN | 0   | 0 | 0 | 0   | 0   | 0   | 0   |
| CCL11 | 1.    | 0   | - | - | -   | 0   | 0   | 0.3 |
|       | 2.    | 0   | - | - | -   | 0.1 | 0   | 0   |
|       | 3.    | 0   | 0 | 0 | 0   | 0   | 0   | 0.2 |
|       | 4.    | 0   | 0 | 0 | 0   | 0   | 0.1 | 0.2 |
|       | 5.IFN | 0   | 0 | 0 | 0   | 0   | 0   | 0   |
| CCL16 | 1.    | 0   | - | - | -   | 0.1 | 0.2 | 0   |
|       | 2.    | 0   | - | - | -   | 0   | 0   | 0   |
|       | 3.    | 0   | 0 | 0 | 0   | 0.2 | 0   | 0   |
|       | 4.    | 0   | 0 | 0 | 0   | 0   | 0   | 0   |
|       | 5.IFN | 0   | 0 | 0 | 0   | 0   | 0   | 0   |
| CCL17 | 1.    | 0   | - | - | -   | 0   | 1   | 3   |
|       | 2.    | 0   | - | - | -   | 30  | 79  | 95  |
|       | 3.    | 0   | 0 | 0 | 0   | 0   | 0   | 2   |
|       | 4.    | 0   | 0 | 0 | 0   | 0   | 2   | 4   |
|       | 5.IFN | 0   | 0 | 0 | 0   | 0   | 0   | 0   |
| CCL25 | 1.    | 0   | - | - | -   | 0   | 0   | 0.7 |
|       | 2.    | 0   | - | - | -   | 0   | 0   | 0   |
|       | 3.    | 0   | 0 | 0 | 0   | 0   | 0   | 0   |
|       | 4.    | 0   | 0 | 0 | 0   | 0   | 0   | 0   |
|       | 5.IFN | 0   | 0 | 0 | 0   | 0.2 | 0.1 | 0.4 |
| CCL26 | 1.    | 0.2 | - | - | -   | 0.3 | 0   | 9   |
|       | 2.    | 0   | - | - | -   | 0.3 | 0   | 0.2 |
|       | 3.    | 0   | 0 | 0 | 0   | 0   | 0   | 0   |
|       | 4.    | 0   | 0 | 0 | 0   | 0   | 0   | 0   |
|       | 5.IFN | 0   | 0 | 0 | 0   | 0   | 0   | 0   |

|        |       |     |     |     |   |     |      |      |              |
|--------|-------|-----|-----|-----|---|-----|------|------|--------------|
| CXCL9  | 1.    | 2   | -   | -   | - | 0.3 | 0    | 0.5  |              |
|        | 2.    | 3   | -   | -   | - | 0.3 | 0.3  | 0.3  |              |
|        | 3.    | 0.2 | 0   | 0   | 2 | 0   | 0    | 1    |              |
|        | 4.    | 2   | 0.2 | 0   | 4 | 0   | 0    | 0    |              |
|        | 5.IFN | 3   | 1   | 1   | 1 | 633 | 6084 | 4671 | 100x (2000x) |
| CXCL12 | 1.    | 0   | -   | -   | - | 0   | 0    | 0    |              |
|        | 2.    | 0   | -   | -   | - | 0   | 0    | 0    |              |
|        | 3.    | 0   | 0   | 0   | 0 | 0   | 0    | 0    |              |
|        | 4.    | 0   | 0   | 0   | 0 | 0.1 | 0    | 0    |              |
|        | 5.IFN | 0   | 0   | 0   | 0 | 0   | 0.1  | 0    |              |
| CXCL13 | 1.    | 0   | -   | -   | - | 0.1 | 1    | 3    |              |
|        | 2.    | 2   | -   | -   | - | 0.6 | 2    | 1    |              |
|        | 3.    | 0.5 | 0   | 0.6 | 0 | 0   | 27   | 42   |              |
|        | 4.    | 0   | 0   | 0   | 0 | 0   | 2    | 4    |              |
|        | 5.IFN | 0   | 0   | 0   | 0 | 0   | 0    | 0    |              |
| CXCL14 | 1.    | 0   | -   | -   | - | 2   | 0.5  | 0.2  |              |
|        | 2.    | 0   | -   | -   | - | 0.6 | 0.1  | 0.1  |              |
|        | 3.    | 0   | 0.5 | 0.2 | 0 | 0.4 | 0    | 0    |              |
|        | 4.    | 0   | 1   | 0   | 0 | 2   | 0.7  | 0.5  |              |
|        | 5.IFN | 0   | 0.4 | 0   | 0 | 0.2 | 0    | 0    |              |
| CXCL17 | 1.    | 0   | -   | -   | - | 0   | 0.2  | 0    |              |
|        | 2.    | 0   | -   | -   | - | 0   | 0    | 0    |              |
|        | 3.    | 0   | 0   | 0   | 0 | 0   | 0    | 0    |              |
|        | 4.    | 0   | 0   | 0   | 0 | 0   | 0    | 0    |              |
|        | 5.IFN | 0   | 0   | 0   | 0 | 0   | 0    | 0    |              |
